# Supplementary material for: Impact of Multidisciplinary Team Discussion on Treatment Decision-Making and Survival in Early-Stage HR+/HER2-Breast Cancer
Source: Research Square preprint supplement (doi:10.21203/rs.3.rs-8499154/v1), 2026-01-19
Supplement: Supplementary file 1 [file ecf00fe89d3f14d50622d1ed.docx]

| **Table S 1Multivariable Cox regression analysis of Disease Specific Survival** | | | |
| --- | --- | --- | --- |
| P value | Exp(B) | 95.0% CI | |
| Age | 0.102 | 1.042 | 0.992-1.094 | |
| Stage | <0.001 |  |  | |
| Stage Ⅰ VS Ⅱ | <0.001 | 0.005 | 0.000-0.054 | |
| Stage Ⅰ VS Ⅲ | <0.001 | 0.003 | 0.000-0.043 | |
| Stage Ⅰ VS Ⅳ | 0.027 | 0.054 | 0.004-0.719 | |
| HR/HER2 | <0.001 |  |  | |
| HR+/HER2- vs HR-/HER2+ | 0.925 | 3454.541 | 0.000-1.689E+77 | |
| HR+/HER2-vs HR-/HER2- | 0.914 | 11471.385 | 0.000-5.625E+77 | |
| HR+/HER2-vs HR+/HER2+ | 0.900 | 50809.224 | 0.000-2.481E+78 | |
| LVI (Yes vs No) | 0.970 | 0.970 | 0.194-4.840 | |
| KI-67(≤14 vs > 14) | 0.417 | 1.938 | 0.392-9.587 | |
| MDT (Yes vs No) | 0.030 | 0.293 | 0.097-0.886 | |

**NOTE: LVI Lymphovascular Invasion**

**Table S 2** **1:1 propensity score matching cohort (N=304)**

| Characteristics | MDT group | Observe group | SMD |
| --- | --- | --- | --- |
| Median age±SD | 55.9±9.9 | 56.8±10.9 | 0.086 |
| ≤45 | 19(12.6) | 18(11.8) | 0.023 |
| >45 | 132(87.4) | 134(88.2) |
| Stage |  |  | 0.026 |
| Ⅰ | 79(52.0) | 79(52.0) | 0 |
| Ⅱ | 47(30.9) | 50(32.9) | 0.043 |
| Ⅲ | 25(16.4) | 21(13.8) | 0.073 |
| Ⅳ | 1(0.7) | 2(1.3) | 0.060 |

| **Table S 3 Multivariable Cox regression analysis of Disease Specific Survival（N=304）** | | | |
| --- | --- | --- | --- |
| P value | | Exp(B) | 95.0% CI | |
| Age | 0.247 | 1.038 | 0.975-1.106 | |
| Stage | <0.001 |  |  | |
| Stage Ⅰ VS Ⅱ | <0.001 | 0.003 | 0.000-0.034 | |
| Stage Ⅰ VS Ⅲ | <0.001 | 0.001 | 0.000-0.014 | |
| Stage Ⅰ VS Ⅳ | 0.003 | 0.011 | 0.001-0.210 | |
| HR Status (Positive vs Negative) | <0.001 | 0.073 | 0.020-0.270 | |
| HER2 Status (Positive vs Negative) | 0.183 | 0.315 | 0.058-1.723 | |
| LVI (Yes vs No) | 0.395 | 2.404 | 0.319-18.164 | |
| KI-67(≤14 vs > 14) | 0.537 | 1.676 | 0.325-8.640 | |
| MDT (Yes vs No) | 0.029 | 0.211 | 0.052-0.854 | |

**Table S 4 1:1 propensity score matching HR+/HER2- cohort (n=140)**

| Characteristics | MDT group | Observe group | SMD |
| --- | --- | --- | --- |
| **menopause** |  |  |  |
| Pre-menopause | 21(30.0) | 20(28.6) | 0.031 |
| Post-menopause | 49(70.0) | 50(71.4) |  |
| **Breast-conserving** |  |  |  |
| Yes | 21(30.0) | 22(31.4) | 0.015 |
| NO | 49(70.0) | 48(68.6) |  |
| **N-stage** |  |  |  |
| **N0** | 58(82.9) | 57(81.4) | 0.039 |
| N1 | 12(17.1) | 13(18.6) |  |
| **Grade** |  |  |  |
| G1 | 8(12.9) | 7(10.6) | 0.071 |
| G2 | 46(74.2) | 50(75.8) | 0.037 |
| G3 | 8(12.9) | 9(13.6) | 0.020 |
|  |  |  |  |
